# Supplementary material
Source: publisher figshare collection journal article supplement (https://gsajournals.figshare.com/ndownloader/files/12776390)
Supplement: Supplementary file 1 [file 12776390]

Table S1. Phenotype data for the CB27 by IT82E-18 population
Line	SeedCoat	PodTip
CB27/BB-001	0	0
CB27/BB-003	1	1
CB27/BB-004	NaN	NaN
CB27/BB-005	0	0
CB27/BB-007	0	0
CB27/BB-008	0	0
CB27/BB-009	1	1
CB27/BB-010	1	1
CB27/BB-012	0	0
CB27/BB-013	1	1
CB27/BB-014	0	0
CB27/BB-015	NaN	NaN
CB27/BB-016	0	0
CB27/BB-017	1	1
CB27/BB-018	1	1
CB27/BB-019	0	0
CB27/BB-020	0	0
CB27/BB-021	1	1
CB27/BB-022	1	1
CB27/BB-024	0	0
CB27/BB-025	0	0
CB27/BB-026	NaN	NaN
CB27/BB-029	1	1
CB27/BB-030	1	1
CB27/BB-031	1	1
CB27/BB-032	0	0
CB27/BB-033	NaN	NaN
CB27/BB-034	0	0
CB27/BB-035	NaN	NaN
CB27/BB-036	1	1
CB27/BB-037	0	0
CB27/BB-038	1	1
CB27/BB-040	0	0
CB27/BB-041	0	0
CB27/BB-042	0	0
CB27/BB-044	1	1
CB27/BB-046	1	1
CB27/BB-047	1	NaN
CB27/BB-048	0	0
CB27/BB-050	1	1
CB27/BB-051	1	1
CB27/BB-052	1	1
CB27/BB-053	1	1
CB27/BB-054	0	0
CB27/BB-055	1	1
CB27/BB-057	NaN	NaN
CB27/BB-058	1	1
CB27/BB-060	0	0
CB27/BB-062	NaN	NaN
CB27/BB-063	NaN	NaN
CB27/BB-064	1	1
CB27/BB-065a	0	0
CB27/BB-066	NaN	NaN
CB27/BB-067	NaN	NaN
CB27/BB-068	0	0
CB27/BB-072	NaN	NaN
CB27/BB-073	NaN	NaN
CB27/BB-074	NaN	NaN
CB27/BB-075	1	1
CB27/BB-076	0	0
CB27/BB-078	NaN	NaN
CB27/BB-079	1	1
CB27/BB-080	1	1
CB27/BB-081	0	0
CB27/BB-082	NaN	NaN
CB27/BB-083	1	1
CB27/BB-085	0	0
CB27/BB-087	0	0
CB27/BB-088	1	1
CB27/BB-088-2	NaN	NaN
CB27/BB-090	0	NaN
CB27/BB-091b	1	NaN
CB27/BB-091a	0	0
CB27/BB-092	0	0
CB27/BB-093	NaN	NaN
CB27/BB-096	NaN	NaN
CB27/BB-097	0	0
CB27/BB-098	1	1
CB27/BB-100	1	1
CB27/BB-101	1	1
CB27/BB-103	1	1
CB27/BB-104	NaN	NaN
CB27/BB-105	NaN	NaN
CB27/BB-106	0	0
CB27/BB-107	1	1
CB27/BB-108	NaN	NaN
CB27/BB-109	0	0
CB27/BB-110	0	0
CB27/BB-111	0	NaN
CB27/BB-112	1	1
CB27/BB-113	0	NaN
CB27/BB-114	0	0
CB27/BB-115	0	NaN
CB27/BB-150	1	1
